# Supplementary material for: Filtered circular fingerprints improve either prediction or runtime performance while retaining interpretability
Source: PubMed Central journal article supplement (PMC5088672; doi:10.1186/s13321-016-0173-z), 2016-10-31

This document provides additional information for the article **Filtered Circular Fingerprints Improve Either Prediction Or Runtime Performance While Retaining Interpretability** submitted to the Journal of Cheminformatics by M. Gütlein and S. Kramer (contact: guetlein@uni-mainz.de).

## Additional file 1 — AUPRC and AUROC curves for Table 1

Ranking of active (1) and inactive (0) compounds due to predicted probability

(a) 1101111111011100000001000000000000000000000100000000000000100  
 (b) 11011111110111000000010000000000000000000001000000000001000000  
 (c) 110111111101110000000100000000000000000010000000000000000100  
 (d) 1101111111011100010000000000000000000000000100000000000000100  
 (e) 1111110111011100000001000000000000000000000100000000000000100

|     | AUROC | $\Delta$ | AUPRC | $\Delta$ | EF-5% | $\Delta$ | BEDROC-20 | $\Delta$ | BEDROC-100 | $\Delta$ |
|-----|-------|----------|-------|----------|-------|----------|-----------|----------|------------|----------|
| (a) | 0.864 |          | 0.772 |          | 2.9   |          | 0.884     |          | 0.885      |          |
| (b) | 0.869 | +0.005   | 0.773 | +0.001   | 2.9   | 0        | 0.889     | +0.005   | 0.889      | +0.003   |
| (c) | 0.869 | +0.005   | 0.774 | +0.002   | 2.9   | 0        | 0.889     | +0.005   | 0.89       | +0.004   |
| (d) | 0.869 | +0.005   | 0.78  | +0.009   | 2.9   | 0        | 0.89      | +0.006   | 0.892      | +0.006   |
| (e) | 0.869 | +0.005   | 0.822 | +0.051   | 4.3   | +1.4     | 0.89      | +0.006   | 0.893      | +0.008   |

**Table 1** Comparing AUPRC to other virtual screening measures when improving a reference ranking (a) at different positions (b-e).

Each bit resembles an active (1) or in-active compound (0). Each bit-string (a-e) corresponds to the result of a classifier that ranks all test-set compounds according to their predicted probability of being active. A perfect prediction would list all "1s" before "0s". The reference prediction (a) has an AUROC (the area under the ROC curve) score of 0.864 (Hence, the probability that a randomly drawn active compound is ranked higher than an in-active compound is 86.4%). We improve the reference prediction (a) by modifying the predicted probability of a single compound at different positions in the ranking: in (b-d), a single active compound is predicted with higher probability and shifted 4 positions upwards in the ranking. In (e), a single in-active compound is predicted with lower probability and is moved 4 positions downwards in the ranking. When performing virtual screening, the last change (e) is probably most important to us, as we are interested in the compounds that are most likely active. However, the change in AUROC is constant for (b-e). EF (enrichment factor) and BEDROC (Boltzmann-Enhanced Discrimination of ROC) have the disadvantage of relying on a user defined parameter. Moreover, EF-5% changes only if the number (not the ordering) of active compounds within the top  $\chi$  bits (here: 3) differs. In the contrary, AUPRC (the area under precision recall curve) has the desired property that it increases more when the affected ranking position is higher without relying on a parameter.

AUC

AUPRC

(a)

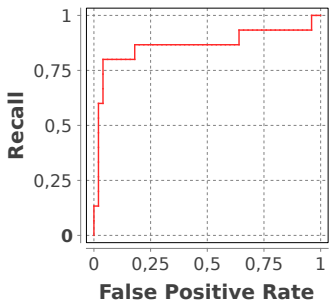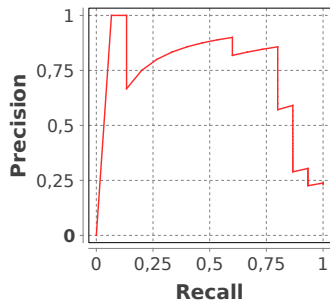

(b)

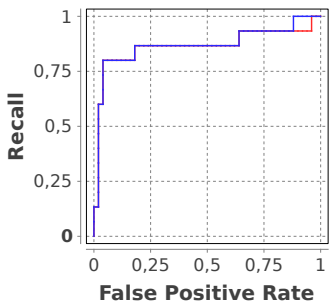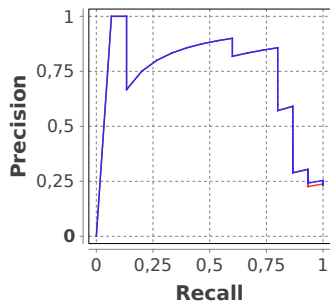

(c)

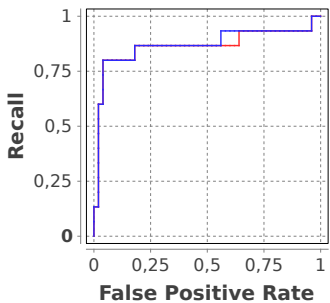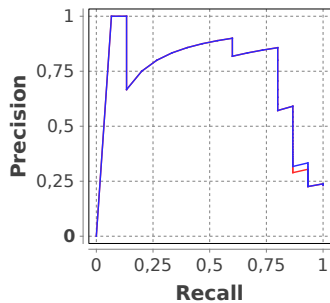

(d)

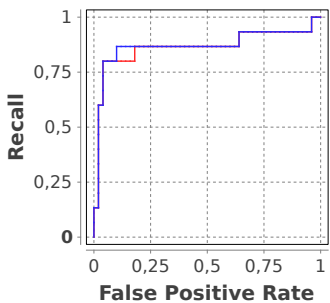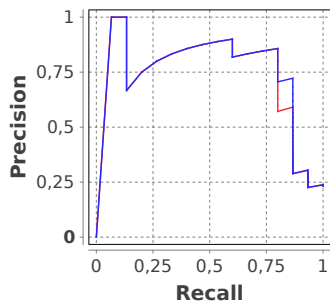

(e)

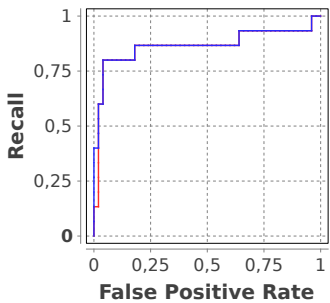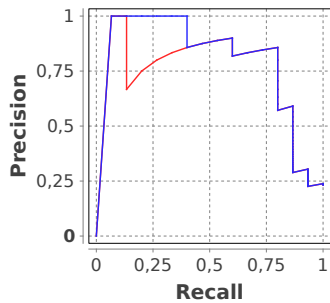

Supplement: 13321_2016_173_MOESM1_ESM.pdf [file 13321_2016_173_MOESM1_ESM.pdf]
