# Supplementary material for: Filtered circular fingerprints improve either prediction or runtime performance while retaining interpretability
Source: J Cheminform. 2016 Oct 31;8:60. doi: 10.1186/s13321-016-0173-z (PMC5088672; doi:10.1186/s13321-016-0173-z)
Supplement: Supplementary file 2 — Additional file 2 . Additional validation plots and tables. [file 13321_2016_173_MOESM2_ESM.pdf]

This document provides additional information for the article **Filtered Circular Fingerprints Improve Either Prediction Or Runtime Performance While Retaining Interpretability** submitted to the Journal of Cheminformatics by **M. Gütlein** and **S. Kramer** (contact: guetlein@uni-mainz.de).

## Additional file 2 — Additional validation plots and tables

### List of Tables

|   |                                                                    |   |
|---|--------------------------------------------------------------------|---|
| 1 | Datasets . . . . .                                                 | 2 |
| 2 | Dataset links . . . . .                                            | 3 |
| 3 | Average number of fragments and bit-collisions with FCFPs. . . . . | 3 |
| 4 | Nested cross-validation results . . . . .                          | 4 |
| 5 | Comparison to models published for the same datasets . . . . .     | 5 |

### List of Figures

|   |                                                                                                      |    |
|---|------------------------------------------------------------------------------------------------------|----|
| 1 | Support vector machines results for different feature sets (ECFP4, 1024). . . . .                    | 6  |
| 2 | Naive Bayes results for different feature sets (ECFP4, 1024). . . . .                                | 7  |
| 3 | Mean changes in AUROC and AUPRC for different feature sets for 1024. . . . .                         | 8  |
| 4 | Mean changes in AUROC and AUPRC for different feature sets for 4096. . . . .                         | 9  |
| 5 | Mean changes in AUROC and AUPRC for different feature sets for 8192. . . . .                         | 10 |
| 6 | Win loss statistics for ECFP4 with increasing bit-vector sizes for AUROC (instead of AUPRC). . . . . | 11 |
| 7 | Win-loss statistics for comparing ECFP diameters for AUROC (instead of AUPRC). . . . .               | 11 |
| 8 | Win-loss statistics comparing ECFPs vs FCFPs for AUROC (instead of AUPRC). . . . .                   | 12 |

| category          | name                  | compounds | active | in-active | target                                        |
|-------------------|-----------------------|-----------|--------|-----------|-----------------------------------------------|
| Balanced          | AMES                  | 4337      | 2401   | 1936      | ames test mutagenicity                        |
| Balanced          | CPDBAS Mouse          | 956       | 430    | 526       | carcinogenicity                               |
| Balanced          | CPDBAS MultiCellCall  | 1095      | 564    | 531       | carcinogenicity                               |
| Balanced          | CPDBAS Mutagenicity   | 829       | 394    | 435       | carcinogenicity                               |
| Balanced          | CPDBAS Rat            | 1169      | 565    | 604       | carcinogenicity                               |
| Balanced          | CPDBAS SingleCellCall | 1464      | 776    | 688       | carcinogenicity                               |
| Balanced          | NCTRER                | 217       | 126    | 91        | Estrogen receptor                             |
| Virtual-Screening | ChEMBL 8              | 10100     | 100    | 10000     | tyrosine-protein kinase ABL                   |
| Virtual-Screening | ChEMBL 15             | 10100     | 100    | 10000     | carbonic anhydrase II                         |
| Virtual-Screening | ChEMBL 25             | 10100     | 100    | 10000     | glucocorticoid receptor                       |
| Virtual-Screening | ChEMBL 36             | 10100     | 100    | 10000     | progesterone receptor                         |
| Virtual-Screening | ChEMBL 43             | 10100     | 100    | 10000     | beta-2 adrenergic receptor                    |
| Virtual-Screening | ChEMBL 51             | 10100     | 100    | 10000     | serotonin 1a (5-HT1a) receptor                |
| Virtual-Screening | ChEMBL 52             | 10100     | 100    | 10000     | alpha-2a adrenergic receptor                  |
| Virtual-Screening | ChEMBL 61             | 10100     | 100    | 10000     | muscarinic acetylcholine receptor M1          |
| Virtual-Screening | ChEMBL 65             | 10100     | 100    | 10000     | cytochrome P450 19A1                          |
| Virtual-Screening | ChEMBL 72             | 10100     | 100    | 10000     | dopamine D2 receptor                          |
| Virtual-Screening | ChEMBL 87             | 10100     | 100    | 10000     | cannabinoid CB1 receptor                      |
| Virtual-Screening | ChEMBL 90             | 10100     | 100    | 10000     | dopamine D4 receptor                          |
| Virtual-Screening | ChEMBL 93             | 10100     | 100    | 10000     | acetylcholinesterase                          |
| Virtual-Screening | ChEMBL 100            | 10100     | 100    | 10000     | norepinephrine transporter                    |
| Virtual-Screening | ChEMBL 104            | 10100     | 100    | 10000     | monoamine oxidase B                           |
| Virtual-Screening | ChEMBL 105            | 10100     | 100    | 10000     | serotonin 1d (5-HT1d) receptor                |
| Virtual-Screening | ChEMBL 107            | 10100     | 100    | 10000     | serotonin 2a (5-HT2a) receptor                |
| Virtual-Screening | ChEMBL 108            | 10100     | 100    | 10000     | serotonin 2c (5-HT2c) receptor                |
| Virtual-Screening | ChEMBL 114            | 10100     | 100    | 10000     | adenosine A1 receptor                         |
| Virtual-Screening | ChEMBL 121            | 10100     | 100    | 10000     | serotonin transporter                         |
| Virtual-Screening | ChEMBL 126            | 10100     | 100    | 10000     | cyclooxygenase-2                              |
| Virtual-Screening | ChEMBL 130            | 10100     | 100    | 10000     | dopamine D3 receptor                          |
| Virtual-Screening | ChEMBL 165            | 10100     | 100    | 10000     | HERG                                          |
| Virtual-Screening | ChEMBL 219            | 10100     | 100    | 10000     | muscarinic acetylcholine receptor M3          |
| Virtual-Screening | ChEMBL 259            | 10100     | 100    | 10000     | cannabinoid CB2 receptor                      |
| Virtual-Screening | ChEMBL 10188          | 10100     | 100    | 10000     | MAP kinase p38 alpha                          |
| Virtual-Screening | ChEMBL 10193          | 10100     | 100    | 10000     | carbonic anhydrase I                          |
| Virtual-Screening | ChEMBL 10260          | 10100     | 100    | 10000     | vanilloid receptor                            |
| Virtual-Screening | ChEMBL 10280          | 10100     | 100    | 10000     | histamine H3 receptor                         |
| Virtual-Screening | ChEMBL 10378          | 10100     | 100    | 10000     | cathepsin B                                   |
| Virtual-Screening | ChEMBL 10434          | 10100     | 100    | 10000     | tyrosine-protein kinase SRC                   |
| Virtual-Screening | ChEMBL 10498          | 10100     | 100    | 10000     | cathepsin L                                   |
| Virtual-Screening | ChEMBL 10980          | 10100     | 100    | 10000     | vascular endothelial growth factor receptor 2 |
| Virtual-Screening | ChEMBL 11140          | 10100     | 100    | 10000     | dipeptidyl peptidase IV                       |
| Virtual-Screening | ChEMBL 11359          | 10100     | 100    | 10000     | phosphodiesterase 4D                          |
| Virtual-Screening | ChEMBL 11365          | 10100     | 100    | 10000     | cytochrome P450 2D6                           |
| Virtual-Screening | ChEMBL 11489          | 10100     | 100    | 10000     | 11-beta-hydroxysteroid dehydrogenase 1        |
| Virtual-Screening | ChEMBL 11534          | 10100     | 100    | 10000     | cathepsin S                                   |
| Virtual-Screening | ChEMBL 11575          | 10100     | 100    | 10000     | C-C chemokine receptor type 2                 |
| Virtual-Screening | ChEMBL 11631          | 10100     | 100    | 10000     | sphingosine 1-phosphate receptor Edg-1        |
| Virtual-Screening | ChEMBL 12209          | 10100     | 100    | 10000     | carbonic anhydrase XII                        |
| Virtual-Screening | ChEMBL 12252          | 10100     | 100    | 10000     | beta-secretase 1                              |
| Virtual-Screening | ChEMBL 12261          | 10100     | 100    | 10000     | c-Jun N-terminal kinase 1                     |
| Virtual-Screening | ChEMBL 12670          | 10100     | 100    | 10000     | tyrosine-protein kinase receptor FLT3         |
| Virtual-Screening | ChEMBL 12911          | 10100     | 100    | 10000     | cytochrome P450 2C9                           |
| Virtual-Screening | ChEMBL 12952          | 10100     | 100    | 10000     | carbonic anhydrase IX                         |
| Virtual-Screening | ChEMBL 13001          | 10100     | 100    | 10000     | matrix metalloproteinase-2                    |
| Virtual-Screening | ChEMBL 17045          | 10100     | 100    | 10000     | cytochrome P450 3A4                           |
| Virtual-Screening | ChEMBL 19905          | 10100     | 100    | 10000     | melanin-concentrating hormone receptor 1      |
| Virtual-Screening | ChEMBL 100579         | 10100     | 100    | 10000     | nicotinic acid receptor 1                     |
| Virtual-Screening | DUD cdk2              | 1779      | 47     | 1732      | cyclin-dependent kinase                       |
| Virtual-Screening | DUD hivrt             | 1333      | 31     | 1302      | HIV reverse transcriptase                     |
| Virtual-Screening | DUD vegfr2            | 2355      | 48     | 2307      | vascular endothelial growth factor receptor   |
| Virtual-Screening | MUV 466               | 15029     | 30     | 14999     | S1P1 rec. (GPCR) Agonist                      |
| Virtual-Screening | MUV 548               | 15030     | 30     | 15000     | PKA (Kinase) Inhibitor                        |
| Virtual-Screening | MUV 600               | 15029     | 30     | 14999     | SF1 (Nuclear Receptor) Inhibitor              |
| Virtual-Screening | MUV 644               | 15027     | 30     | 14997     | Rho-Kinase2 Inhibitor                         |
| Virtual-Screening | MUV 652               | 15030     | 30     | 15000     | HIV RT-RNase Inhibitor                        |
| Virtual-Screening | MUV 689               | 15023     | 30     | 14993     | Eph rec. A4 (Rec. Tyr. Kinase) Inhibitor      |
| Virtual-Screening | MUV 692               | 15030     | 30     | 15000     | SF1 (Nuclear Receptor) Agonist                |
| Virtual-Screening | MUV 712               | 15024     | 30     | 14994     | HSP 90 (Chaperone) Inhibitor                  |
| Virtual-Screening | MUV 713               | 15019     | 30     | 14989     | ER-a-Coact. Bind. (PPI) Inhibitor             |
| Virtual-Screening | MUV 733               | 15023     | 30     | 14993     | ER--Coact. Bind. (PPI) Inhibitor              |
| Virtual-Screening | MUV 737               | 15026     | 30     | 14996     | ER-a-Coact. Bind. (PPI) Potentiator           |
| Virtual-Screening | MUV 810               | 15028     | 30     | 14998     | FAK (Kinase) Inhibitor                        |
| Virtual-Screening | MUV 832               | 15030     | 30     | 15000     | Cathepsin G (Protease) Inhibitor              |
| Virtual-Screening | MUV 852               | 15021     | 30     | 14991     | FXIIa (Protease) Inhibitor                    |
| Virtual-Screening | MUV 858               | 15030     | 30     | 15000     | D1 rec. (GPCR) Allosteric Modulator           |
| Virtual-Screening | MUV 859               | 15029     | 30     | 14999     | M1 rec. (GPCR) Allosteric Modulator           |

Table 1 Datasets

| dataset/group | source                                                                                                                                                                                                                                |
|---------------|---------------------------------------------------------------------------------------------------------------------------------------------------------------------------------------------------------------------------------------|
| AMES          | <a href="http://www.cheminformatics.org/datasets/bursi">http://www.cheminformatics.org/datasets/bursi</a>                                                                                                                             |
| CPDBAS        | <a href="http://www.epa.gov/ncct/dsstox/sdf_cpdbas.html">http://www.epa.gov/ncct/dsstox/sdf_cpdbas.html</a>                                                                                                                           |
| NCTRER        | <a href="http://www.epa.gov/ncct/dsstox/sdf_nctrer.html">http://www.epa.gov/ncct/dsstox/sdf_nctrer.html</a>                                                                                                                           |
| ChEMBL        | <a href="https://github.com/rdkit/benchmarking_platform">https://github.com/rdkit/benchmarking_platform</a>                                                                                                                           |
| DUD           | <a href="http://dud.docking.org">http://dud.docking.org</a> , <a href="https://github.com/rdkit/benchmarking_platform">https://github.com/rdkit/benchmarking_platform</a>                                                             |
| MUV           | <a href="http://www.pharmchem.tu-bs.de/lehre/baumann/MUV.html">http://www.pharmchem.tu-bs.de/lehre/baumann/MUV.html</a> , <a href="https://github.com/rdkit/benchmarking_platform">https://github.com/rdkit/benchmarking_platform</a> |

Table 2 Dataset links

| Type  | Fragments | 1024 |          | 2048 |          | 4096 |          | 8192 |          |
|-------|-----------|------|----------|------|----------|------|----------|------|----------|
|       |           | rate | bit-load | rate | bit-load | rate | bit-load | rate | bit-load |
| fcfp6 | 41120.71  | 0.99 | 40.16    | 0.98 | 20.1     | 0.96 | 10.08    | 0.91 | 5.11     |
| fcfp4 | 7497.14   | 0.97 | 7.35     | 0.88 | 3.78     | 0.64 | 2.19     |      |          |
| fcfp2 | 325.47    |      |          |      |          |      |          |      |          |
| fcfp0 | 13.5      |      |          |      |          |      |          |      |          |

Table 3 Average number of fragments and bit-collisions with FCFPs.

*Rate* is the ratio of bit positions that are mapped by more than one fragment (e.g., 97% of bit-positions correspond to multiple fragments for FCFP4 and bit-vector size 1024). *Bit-load* is the mean number of fragments that are mapped to a single bit position.

| Dataset               | Algorithm | AlgParams             | #Frag | Accur. | AUC   | AUPRC | Sensit. | Specif. |
|-----------------------|-----------|-----------------------|-------|--------|-------|-------|---------|---------|
| AMES                  | RF        |                       | 4096  | 0.837  | 0.91  | 0.922 | 0.849   | 0.822   |
| CPDBAS Mouse          | NB        |                       | 2048  | 0.655  | 0.72  | 0.684 | 0.664   | 0.648   |
| CPDBAS MultiCellCall  | RF        |                       | 2048  | 0.692  | 0.767 | 0.794 | 0.716   | 0.667   |
| CPDBAS Mutagenicity   | RF        |                       | 1024  | 0.772  | 0.837 | 0.84  | 0.723   | 0.816   |
| CPDBAS Rat            | RF        |                       | 2048  | 0.664  | 0.717 | 0.712 | 0.622   | 0.703   |
| CPDBAS SingleCellCall | RF        |                       | 2048  | 0.672  | 0.733 | 0.767 | 0.714   | 0.625   |
| DUD cdk2              | SVM       | C:1 Linear            | 2048  | 0.993  | 0.99  | 0.923 | 0.755   | 0.999   |
| DUD hivrt             | SVM       | C:100 RBF Gamma:0.01  | 2048  | 0.988  | 0.986 | 0.859 | 0.483   | 1       |
| DUD vegfr2            | SVM       | C:10 RBF Gamma:0.01   | 2048  | 0.993  | 0.998 | 0.958 | 0.687   | 1       |
| NCTRER                | RF        |                       | 1024  | 0.871  | 0.931 | 0.952 | 0.884   | 0.853   |
| ChEMBL 100            | SVM       | C:100 RBF Gamma:0.001 | 2048  | 0.995  | 0.963 | 0.731 | 0.56    | 0.999   |
| ChEMBL 100579         | RF        |                       | 1024  | 0.998  | 1     | 0.999 | 0.84    | 1       |
| ChEMBL 10188          | SVM       | C:10 RBF Gamma:0.01   | 4096  | 0.995  | 0.97  | 0.805 | 0.68    | 0.998   |
| ChEMBL 10193          | SVM       | C:10 RBF Gamma:0.01   | 8192  | 0.996  | 0.986 | 0.84  | 0.663   | 0.999   |
| ChEMBL 10260          | SVM       | C:10 RBF Gamma:0.01   | 8192  | 0.994  | 0.967 | 0.828 | 0.45    | 1       |
| ChEMBL 10280          | SVM       | C:10 RBF Gamma:0.01   | 1024  | 0.996  | 0.995 | 0.927 | 0.627   | 1       |
| ChEMBL 10378          | SVM       | C:100 RBF Gamma:0.001 | 1024  | 0.996  | 0.992 | 0.942 | 0.65    | 1       |
| ChEMBL 104            | SVM       | C:100 RBF Gamma:0.01  | 8192  | 0.995  | 0.986 | 0.821 | 0.547   | 0.999   |
| ChEMBL 10434          | SVM       | C:10 RBF Gamma:0.01   | 2048  | 0.996  | 0.973 | 0.829 | 0.687   | 0.999   |
| ChEMBL 10498          | RF        |                       | 1024  | 0.995  | 0.992 | 0.931 | 0.537   | 1       |
| ChEMBL 105            | SVM       | C:100 RBF Gamma:0.001 | 1024  | 0.999  | 0.999 | 0.98  | 0.877   | 1       |
| ChEMBL 107            | SVM       | C:100 RBF Gamma:0.001 | 2048  | 0.995  | 0.98  | 0.766 | 0.637   | 0.999   |
| ChEMBL 108            | SVM       | C:10 RBF Gamma:0.01   | 8192  | 0.994  | 0.975 | 0.689 | 0.503   | 0.999   |
| ChEMBL 10980          | SVM       | C:10 RBF Gamma:0.01   | 8192  | 0.994  | 0.986 | 0.826 | 0.42    | 1       |
| ChEMBL 11140          | SVM       | C:10 RBF Gamma:0.01   | 1024  | 0.997  | 0.998 | 0.955 | 0.74    | 1       |
| ChEMBL 11359          | SVM       | C:100 RBF Gamma:0.001 | 1024  | 0.998  | 0.983 | 0.956 | 0.823   | 1       |
| ChEMBL 11365          | SVM       | C:10 RBF Gamma:0.01   | 8192  | 0.992  | 0.95  | 0.501 | 0.367   | 0.998   |
| ChEMBL 114            | RF        |                       | 2048  | 0.993  | 0.967 | 0.693 | 0.367   | 0.999   |
| ChEMBL 11489          | SVM       | C:10 RBF Gamma:0.01   | 8192  | 0.992  | 0.94  | 0.601 | 0.48    | 0.997   |
| ChEMBL 11534          | RF        |                       | 1024  | 0.996  | 0.988 | 0.925 | 0.6     | 1       |
| ChEMBL 11575          | SVM       | C:10 RBF Gamma:0.01   | 1024  | 0.997  | 0.968 | 0.89  | 0.817   | 0.999   |
| ChEMBL 11631          | SVM       | C:10 RBF Gamma:0.01   | 4096  | 0.997  | 0.979 | 0.872 | 0.73    | 1       |
| ChEMBL 121            | SVM       | C:10 RBF Gamma:0.01   | 4096  | 0.995  | 0.987 | 0.809 | 0.62    | 0.999   |
| ChEMBL 12209          | SVM       | C:10 RBF Gamma:0.01   | 2048  | 0.996  | 0.981 | 0.862 | 0.77    | 0.998   |
| ChEMBL 12252          | SVM       | C:10 RBF Gamma:0.01   | 8192  | 0.996  | 0.974 | 0.87  | 0.643   | 1       |
| ChEMBL 12261          | SVM       | C:10 RBF Gamma:0.01   | 4096  | 0.997  | 0.989 | 0.888 | 0.697   | 1       |
| ChEMBL 126            | SVM       | C:10 RBF Gamma:0.01   | 8192  | 0.993  | 0.977 | 0.808 | 0.477   | 0.998   |
| ChEMBL 12670          | SVM       | C:10 RBF Gamma:0.01   | 8192  | 0.996  | 0.99  | 0.877 | 0.63    | 1       |
| ChEMBL 12911          | SVM       | C:10 RBF Gamma:0.01   | 8192  | 0.988  | 0.91  | 0.392 | 0.37    | 0.994   |
| ChEMBL 12952          | RF        |                       | 2048  | 0.995  | 0.993 | 0.851 | 0.64    | 0.999   |
| ChEMBL 130            | SVM       | C:10 RBF Gamma:0.01   | 8192  | 0.994  | 0.98  | 0.783 | 0.427   | 1       |
| ChEMBL 13001          | RF        |                       | 1024  | 0.995  | 0.976 | 0.882 | 0.527   | 1       |
| ChEMBL 15             | SVM       | C:10 RBF Gamma:0.01   | 1024  | 0.994  | 0.981 | 0.815 | 0.56    | 0.998   |
| ChEMBL 165            | SVM       | C:100 RBF Gamma:0.001 | 8192  | 0.992  | 0.947 | 0.573 | 0.453   | 0.998   |
| ChEMBL 17045          | SVM       | C:10 RBF Gamma:0.001  | 8192  | 0.987  | 0.91  | 0.455 | 0.483   | 0.992   |
| ChEMBL 19905          | SVM       | C:100 RBF Gamma:0.01  | 4096  | 0.996  | 0.985 | 0.872 | 0.6     | 1       |
| ChEMBL 219            | SVM       | C:10 RBF Gamma:0.01   | 8192  | 0.996  | 0.987 | 0.861 | 0.643   | 1       |
| ChEMBL 25             | SVM       | C:100 RBF Gamma:0.001 | 4096  | 0.998  | 0.99  | 0.914 | 0.84    | 0.999   |
| ChEMBL 259            | SVM       | C:10 RBF Gamma:0.01   | 8192  | 0.994  | 0.954 | 0.739 | 0.457   | 1       |
| ChEMBL 36             | RF        |                       | 1024  | 0.998  | 0.999 | 0.972 | 0.753   | 1       |
| ChEMBL 43             | RF        |                       | 2048  | 0.992  | 0.856 | 0.501 | 0.383   | 0.998   |
| ChEMBL 51             | SVM       | C:100 RBF Gamma:0.01  | 8192  | 0.996  | 0.986 | 0.903 | 0.583   | 1       |
| ChEMBL 52             | SVM       | C:10 RBF Gamma:0.01   | 8192  | 0.994  | 0.969 | 0.742 | 0.547   | 0.999   |
| ChEMBL 61             | SVM       | C:100 RBF Gamma:0.01  | 8192  | 0.994  | 0.969 | 0.728 | 0.467   | 1       |
| ChEMBL 65             | SVM       | C:10 RBF Gamma:0.01   | 8192  | 0.995  | 0.99  | 0.834 | 0.593   | 0.999   |
| ChEMBL 72             | SVM       | C:10 RBF Gamma:0.01   | 8192  | 0.996  | 0.99  | 0.87  | 0.603   | 1       |
| ChEMBL 8              | SVM       | C:100 RBF Gamma:0.001 | 2048  | 0.996  | 0.985 | 0.829 | 0.673   | 0.999   |
| ChEMBL 87             | SVM       | C:10 RBF Gamma:0.01   | 8192  | 0.993  | 0.932 | 0.619 | 0.277   | 1       |
| ChEMBL 90             | SVM       | C:10 RBF Gamma:0.01   | 8192  | 0.996  | 0.995 | 0.872 | 0.717   | 0.999   |
| ChEMBL 93             | SVM       | C:100 RBF Gamma:0.001 | 2048  | 0.995  | 0.983 | 0.826 | 0.763   | 0.998   |
| MUV 466               | SVM       | C:10 Linear           | 1024  | 0.997  | 0.688 | 0.065 | 0.044   | 0.999   |
| MUV 548               | SVM       | C:10 RBF Gamma:0.01   | 4096  | 0.997  | 0.86  | 0.227 | 0.122   | 0.999   |
| MUV 600               | SVM       | C:10 RBF Gamma:0.1    | 1024  | 0.997  | 0.726 | 0.073 | 0.033   | 0.999   |
| MUV 644               | SVM       | C:100 RBF Gamma:0.01  | 2048  | 0.998  | 0.885 | 0.205 | 0.033   | 1       |
| MUV 652               | SVM       | C:100 RBF Gamma:0.01  | 8192  | 0.998  | 0.712 | 0.086 | 0.011   | 1       |
| MUV 689               | SVM       | C:10 Linear           | 1024  | 0.997  | 0.797 | 0.112 | 0.056   | 0.999   |
| MUV 692               | SVM       | C:100 RBF Gamma:0.001 | 1024  | 0.996  | 0.544 | 0.008 | 0       | 0.998   |
| MUV 712               | SVM       | C:100 RBF Gamma:0.01  | 4096  | 0.997  | 0.83  | 0.199 | 0.156   | 0.998   |
| MUV 713               | SVM       | C:100 RBF Gamma:0.01  | 1024  | 0.997  | 0.689 | 0.068 | 0.067   | 0.999   |
| MUV 733               | SVM       | C:1 RBF Gamma:0.01    | 1024  | 0.995  | 0.608 | 0.102 | 0.089   | 0.997   |
| MUV 737               | SVM       | C:100 RBF Gamma:0.01  | 4096  | 0.996  | 0.67  | 0.052 | 0.033   | 0.998   |
| MUV 810               | SVM       | C:100 RBF Gamma:0.01  | 8192  | 0.998  | 0.794 | 0.161 | 0.067   | 1       |
| MUV 832               | SVM       | C:100 RBF Gamma:0.01  | 1024  | 0.998  | 0.93  | 0.556 | 0.389   | 0.999   |
| MUV 852               | SVM       | C:1 RBF Gamma:0.01    | 1024  | 0.998  | 0.84  | 0.397 | 0.356   | 0.999   |
| MUV 858               | NB        |                       | 1024  | 0.996  | 0.688 | 0.149 | 0.144   | 0.997   |
| MUV 859               | SVM       | C:1 Linear            | 1024  | 0.997  | 0.56  | 0.008 | 0       | 0.999   |

Table 4 Nested cross-validation results

| dataset           | measure  | this work    | other approach | id |
|-------------------|----------|--------------|----------------|----|
| AMES              | AUROC    | <b>0.910</b> | 0.835          | a) |
|                   | AUROC    | <b>0.910</b> | 0.909          | b) |
| CPDB Mutagenicity | AUROC    | <b>0.834</b> | 0.786          | a) |
| CPDB Rat          | Accuracy | <b>66.4</b>  | 61.4           | c) |
| NCTRER            | AUROC    | <b>0.931</b> | 0.806          | d) |
|                   | Accuracy | <b>0.871</b> | 0.857          | e) |
| MUV 466           | AUROC    | <b>0.688</b> | 0.663          | b) |
| MUV 548           | AUROC    | 0.860        | <b>0.881</b>   | b) |
| MUV 600           | AUROC    | <b>0.726</b> | 0.673          | b) |
| MUV 644           | AUROC    | 0.885        | <b>0.895</b>   | b) |
| MUV 652           | AUROC    | 0.712        | <b>0.810</b>   | b) |
| MUV 689           | AUROC    | <b>0.797</b> | 0.730          | b) |
| MUV 692           | AUROC    | 0.544        | <b>0.589</b>   | b) |
| MUV 712           | AUROC    | <b>0.830</b> | 0.813          | b) |
| MUV 713           | AUROC    | 0.689        | <b>0.703</b>   | b) |
| MUV 733           | AUROC    | 0.608        | <b>0.666</b>   | b) |
| MUV 737           | AUROC    | 0.670        | <b>0.671</b>   | b) |
| MUV 810           | AUROC    | <b>0.794</b> | 0.773          | b) |
| MUV 832           | AUROC    | <b>0.930</b> | 0.921          | b) |
| MUV 852           | AUROC    | <b>0.840</b> | 0.821          | b) |
| MUV 858           | AUROC    | 0.688        | 0.688          | b) |
| MUV 859           | AUROC    | 0.560        | <b>0.602</b>   | b) |

  

| approach id | validation scheme     | additional info                                                                                                   |
|-------------|-----------------------|-------------------------------------------------------------------------------------------------------------------|
| a)          | LOO-CV                | <a href="http://lazar.in-silico.de">http://lazar.in-silico.de</a><br>(lazar skips some compounds from prediction) |
| b)          | nested 5-fold CV      | high level of SVM optimization                                                                                    |
| c)          | test set validation   | curated version of the dataset                                                                                    |
| d)          | 10 x 10-fold CV       |                                                                                                                   |
| e)          | holdout 33% test data |                                                                                                                   |

  

| approach id | author    | year | publication                                                                                             |
|-------------|-----------|------|---------------------------------------------------------------------------------------------------------|
| a)          | Helma     | 2006 | <a href="https://dx.doi.org/10.1007/s11030-005-9001-5">https://dx.doi.org/10.1007/s11030-005-9001-5</a> |
| b)          | Rosenbaum | 2011 | <a href="https://dx.doi.org/10.1186/1758-2946-3-11">https://dx.doi.org/10.1186/1758-2946-3-11</a>       |
| c)          | Fjodorova | 2010 | <a href="https://dx.doi.org/10.1186/1752-153X-4-S1-S3">https://dx.doi.org/10.1186/1752-153X-4-S1-S3</a> |
| d)          | Karwath   | 2006 | <a href="https://dx.doi.org/10.1021/ci060159g">https://dx.doi.org/10.1021/ci060159g</a>                 |
| e)          | Cao       | 2012 | <a href="https://dx.doi.org/10.1002/cem.1416">https://dx.doi.org/10.1002/cem.1416</a>                   |

**Table 5 Comparison to models published for the same datasets**

As noted in the article a fair comparison to Riniker et. al (2013, <https://dx.doi.org/10.1021/ci400466r>) is not possible, our models have a higher AUROC in 66/69 cases, their results can be found in supplementary file ci400466r\_si\_007.zip in table figure5\_datasetsI\_auc.csv here: <http://pubs.acs.org/doi/suppl/10.1021/ci400466r>

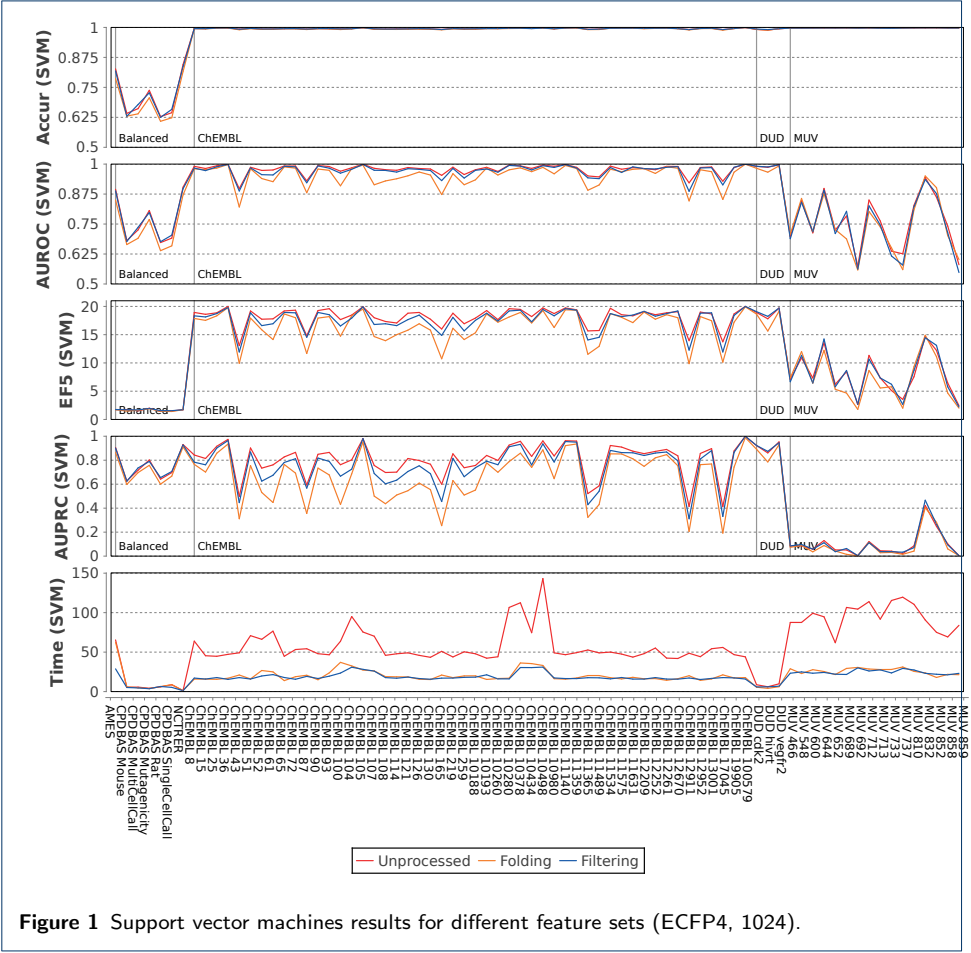

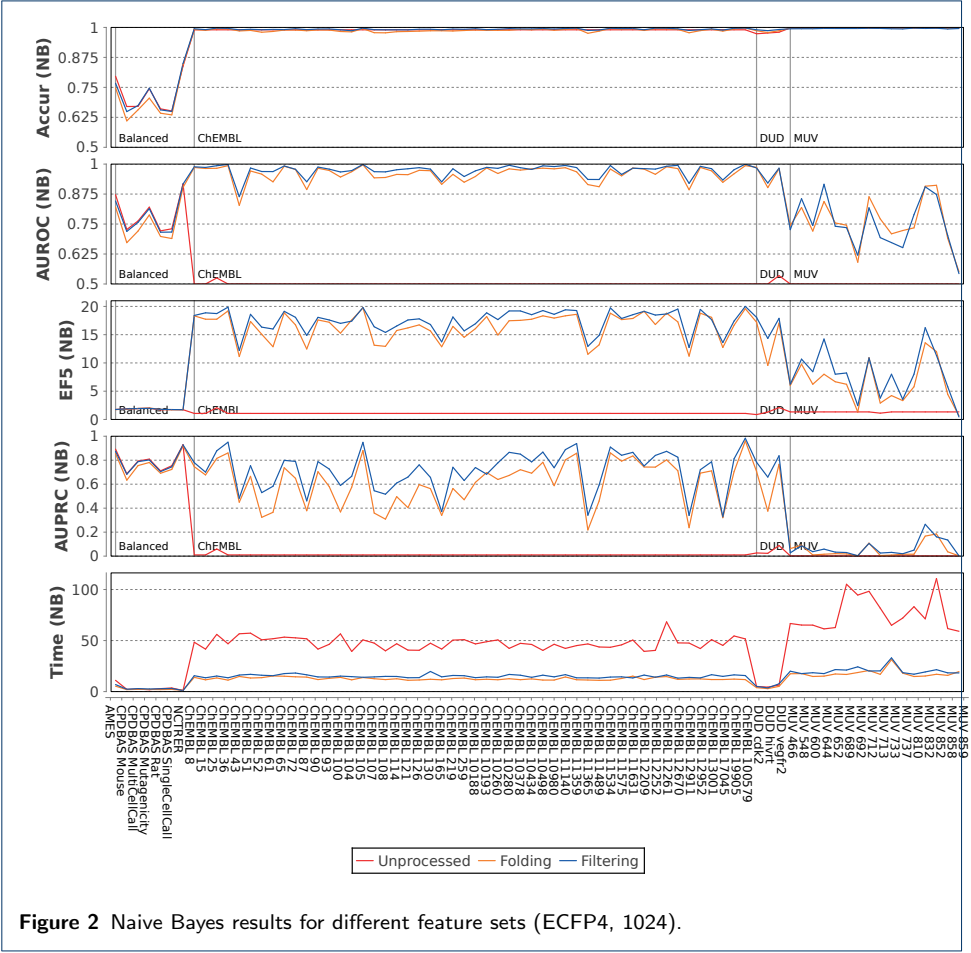

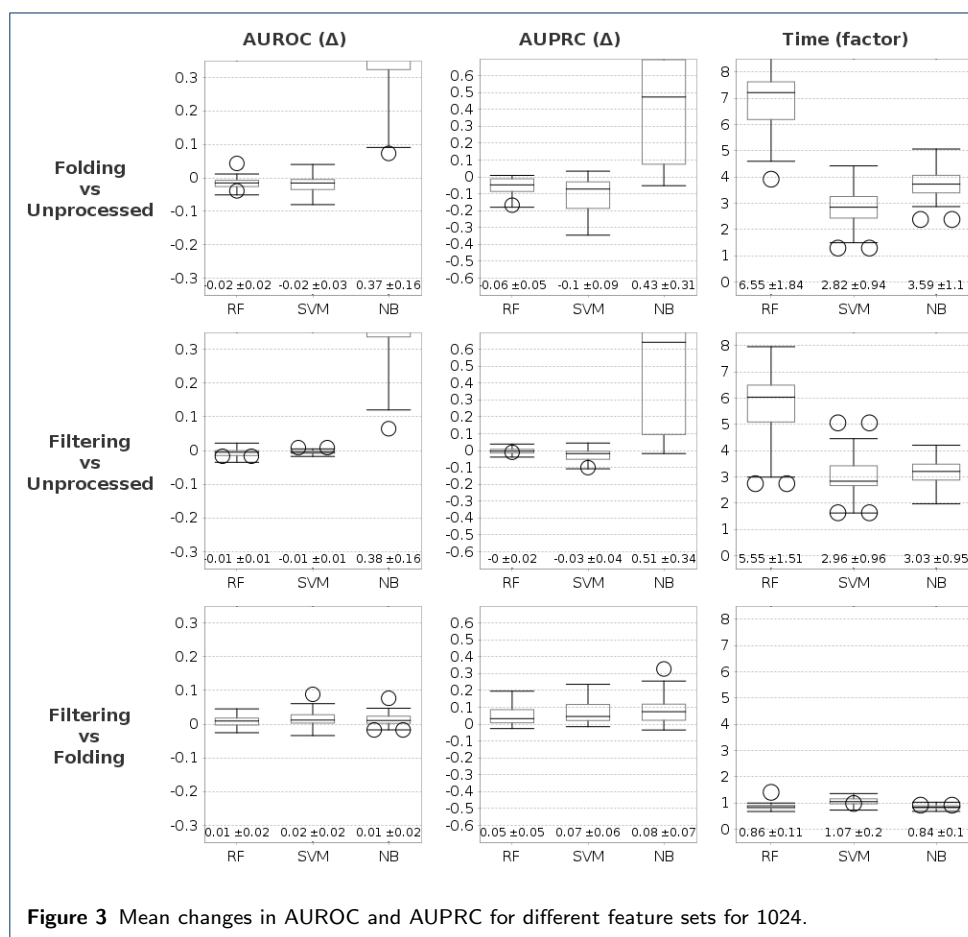

**Figure 3** Mean changes in AUROC and AUPRC for different feature sets for 1024.

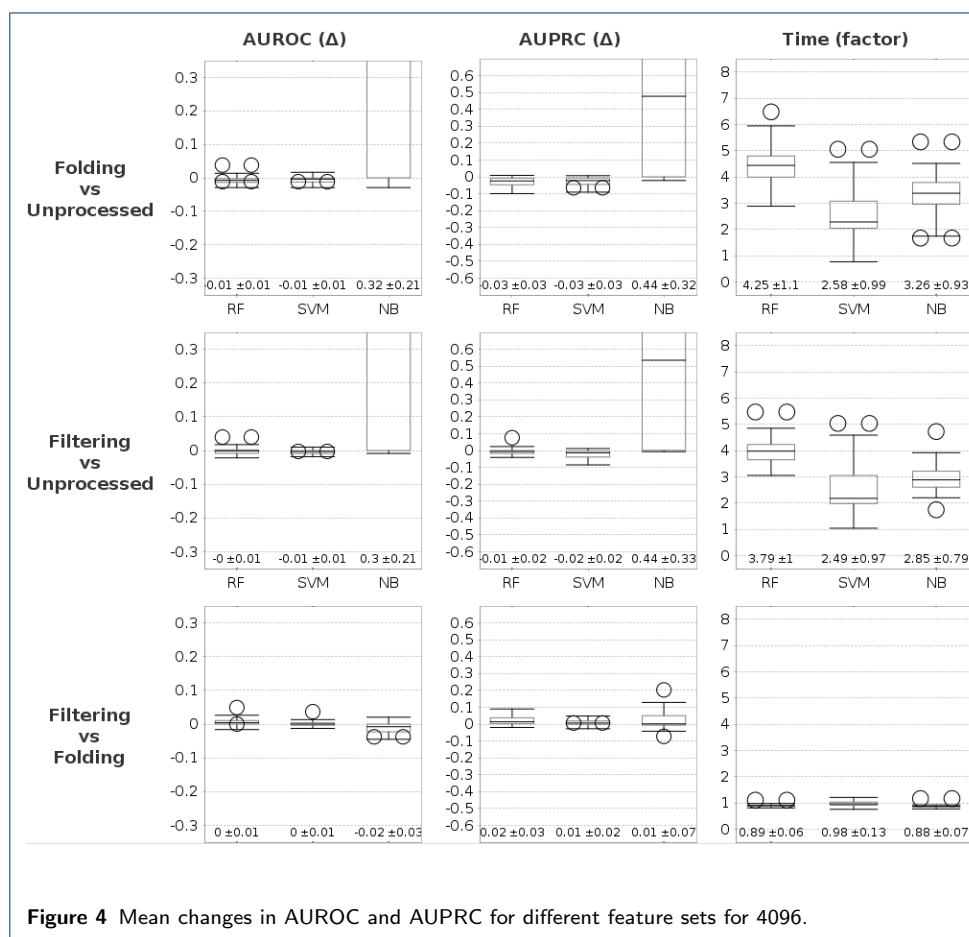

**Figure 4** Mean changes in AUROC and AUPRC for different feature sets for 4096.

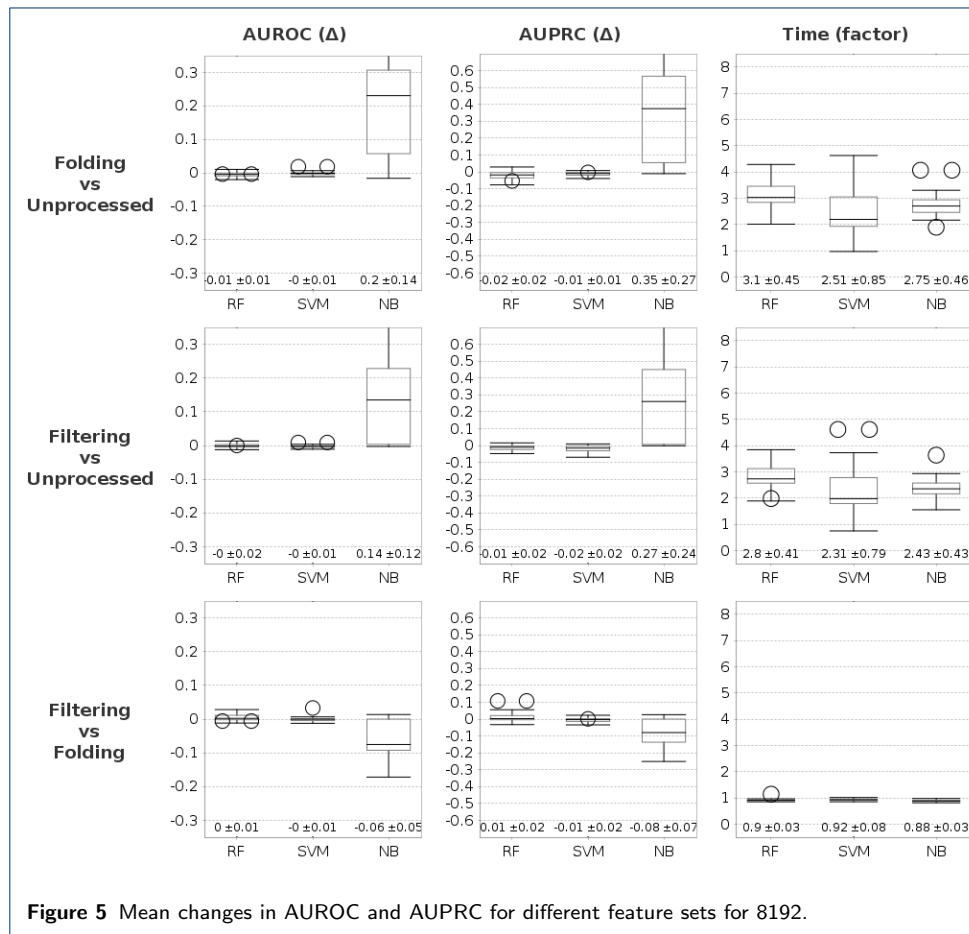

**Figure 5** Mean changes in AUROC and AUPRC for different feature sets for 8192.

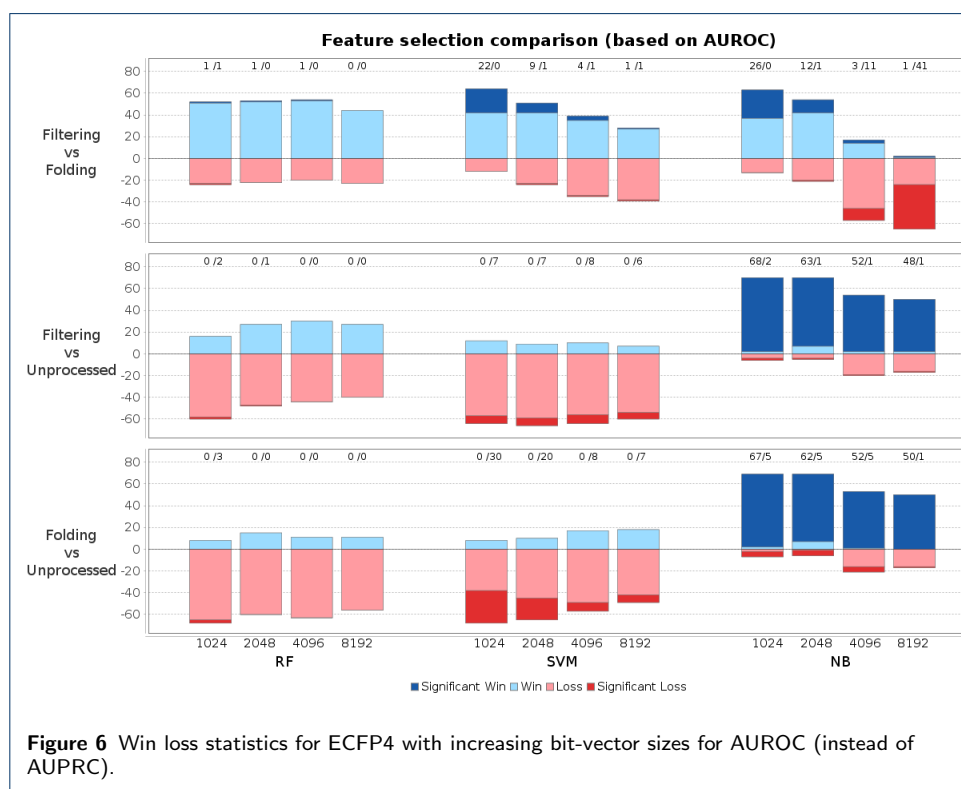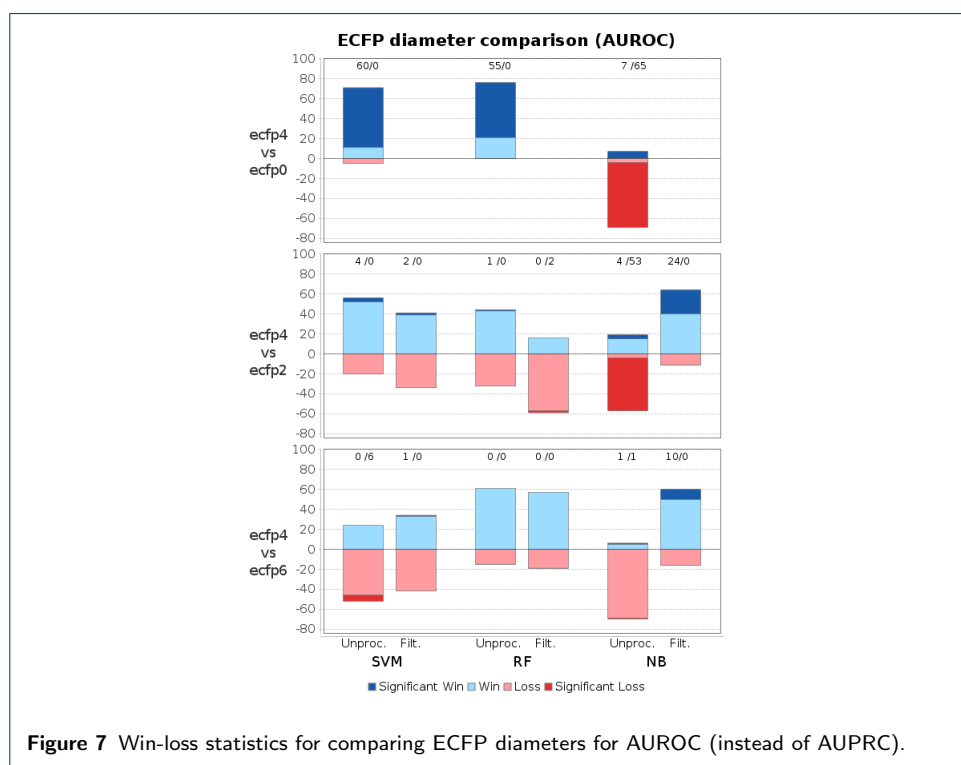

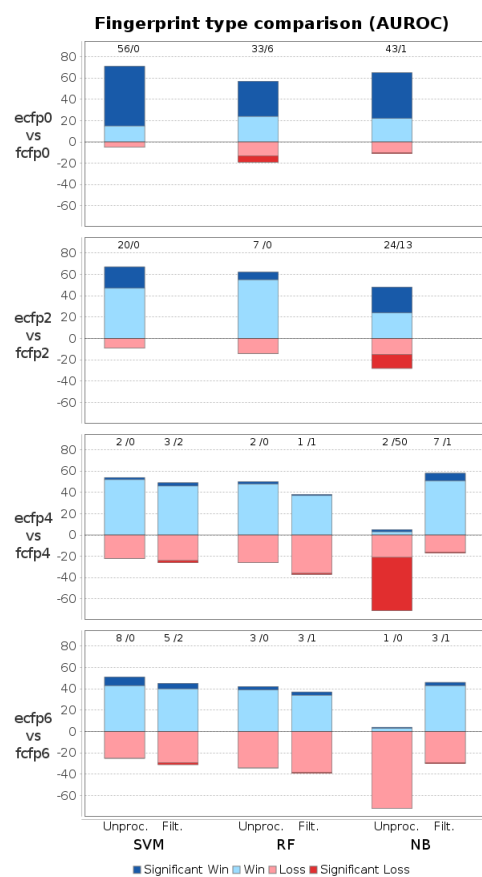

**Figure 8** Win-loss statistics comparing ECFPs vs FCFPs for AUROC (instead of AUPRC).
